# Supplementary material
Source: Springer Nature journal article supplement (https://www.springermedizin.de/resource/supplementary/12968_2012_2627_MOESM2_ESM.pdf/9582358)

# CMR vs SPECT

Entire Study Population

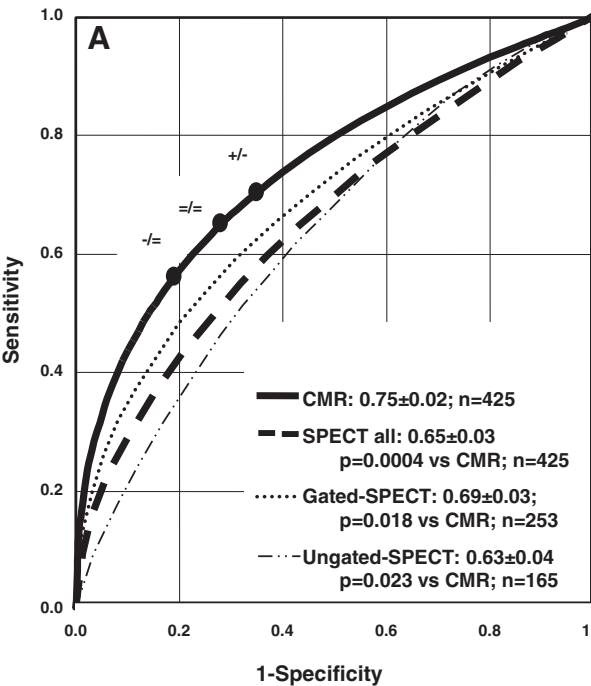

# CMR vs SPECT

Multi-Vessel Disease Population

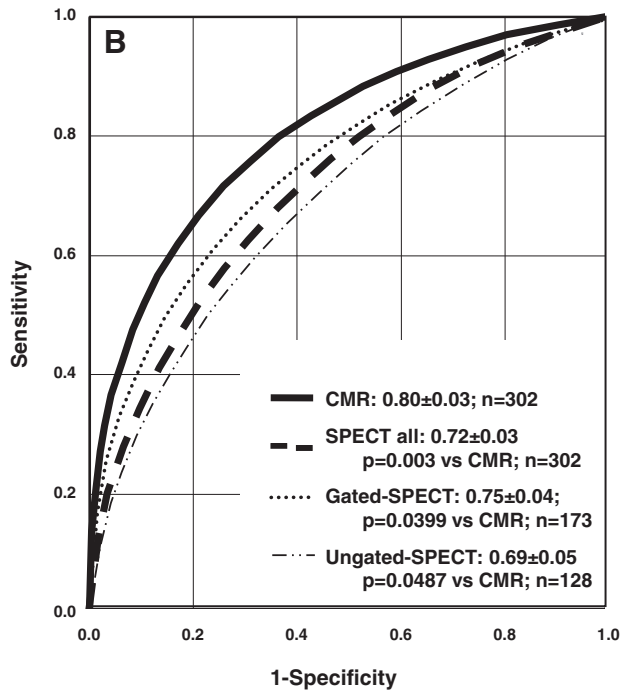

Supplement: MOESM2 [file 9582358]
